# Supplementary material for: Hydrolysis of 2-phenylazophenyltellurium trihalides: isolation of an unprecedented homometallic, discrete heptanuclear organotellurium oxidecluster
Source: Royal Society of Chemistry journal article supplement (doi:10.1039/b921785a), 2009-12-17
Supplement: b921785a.pdf [file b921785a.pdf]

## Supplementary Information

### **Hydrolysis of 2-phenylazophenyltellurium trihalides: isolation of an unprecedented homometallic, discrete heptanuclear organotellurium oxide cluster**

Kriti Srivastava,<sup>a</sup> Sagar Sharma,<sup>a</sup> Harkesh B. Singh,<sup>\*a</sup> Udai P. Singh<sup>b</sup> and Ray J. Butcher<sup>c</sup>

<sup>a</sup>*Department of Chemistry, Indian Institute of Technology Bombay, Powai, Mumbai-400076, India. Fax: +91 22 2572 3480; Tel: +91 22 2576 7190; E-mail: chhbsia@chem.iitb.ac.in*

<sup>b</sup>*Department of Chemistry, Indian Institute of Technology Roorkee, Roorkee 247667, India.*

<sup>c</sup>*Department of Chemistry, Howard University, Washington, D.C 20059, USA.*

## CONTENT

|                                                                                                                                 |       |
|---------------------------------------------------------------------------------------------------------------------------------|-------|
| 1) Experimental                                                                                                                 | 3     |
| 2) FT-IR, $^1\text{H}$ NMR, $^{125}\text{Te}$ NMR, ESI-MS and CHN of <b>4</b>                                                   | 4-9   |
| 3) FT-IR, $^1\text{H}$ NMR, $^{13}\text{C}$ NMR, $^{125}\text{Te}$ NMR, ESI-MS and<br>CHN of $\text{Ph}_2\text{Te}_2\text{O}_3$ | 10-15 |
| 4) Comparision of Te-O bond length of <b>4</b> with other telluroxanes.                                                         | 16    |
| 5) References                                                                                                                   | 18    |

## Experimental

### General experimental Procedures:

Precursors **3a** and **3b** were prepared according to the reported literature procedure<sup>1</sup> with slight modification.<sup>†</sup> The reactions were performed under normal atmospheric conditions unless otherwise mentioned. Solvents were dried and freshly distilled prior to use. Melting points were recorded on a Veego VMP-I melting point apparatus. <sup>1</sup>H NMR spectra were recorded on Varian VXR 400S, Bruker AMX 500 and on Bruker AV800 spectrometer at frequencies 399.59 MHz, 499.85 and 800 MHz respectively. <sup>13</sup>C (100.45 MHz) and <sup>125</sup>Te (157.79 MHz) NMR spectra were recorded on a Varian VXR 400S and Bruker AMX 500 spectrometer respectively. Tetramethylsilyl (SiMe<sub>4</sub>) was used as internal standard for <sup>1</sup>H-NMR. Dimethyltelluride was used as external reference for <sup>125</sup>Te NMR. FT-IR spectra were recorded as KBr pellets on a Nicolet Impact 400 FTIR spectrometer. Elemental analysis was performed on Carlo Erba model 1106 elemental analyzer. The Electro-spray mass spectra were obtained from Thermo Quest Finnigan LCQDECA, ESI-MS (ion trap) mass spectrometer.

<sup>†</sup> **Caution:** Preparation of precursors **3a** and **3b** involves use of mercurated azobenzene derivative. The reactions involving mercury compounds were carried out in a well ventilated fume hood with proper precaution due to their hazardous nature.

**Synthesis of phenyltellurinic anhydride:** The reaction was performed in the similar manner as for **4**. The white colour powder obtained appeared to be phenyl tellurinic anhydride upon general spectroscopic characterization and elemental analysis. The yield of the compound obtained was 0.16 g, 70%. Mp = 215-218 °C; FT-IR (KBr): 3418 (O-H)<sup>\*</sup>, 3406 (C-H), 1434 (C=C, bend), 733 (C-H, asym), 704 (Te=O), 691 (C-H, bend), 665 (C-H, sym), 642 (Te-O) cm<sup>-1</sup>. <sup>1</sup>H-NMR (800 MHz, CD<sub>3</sub>COOD, 25 °C):  $\delta$  8.04 (br, 4H), 7.55 (br, 6H). <sup>13</sup>C NMR (400 MHz, CD<sub>3</sub>COOD, 25 °C):  $\delta$  147.05, 132.64, 131.72, 130.11. <sup>125</sup>Te NMR (500 MHz, CD<sub>3</sub>COOD + DMSO (1:3), 25 °C)<sup>‡</sup>:  $\delta$  965.7 ppm. ESI-MS, m/z 448.9 [C<sub>12</sub>H<sub>10</sub>OTe<sub>2</sub>Na]<sup>+</sup>, 694.9 [C<sub>18</sub>H<sub>15</sub>O<sub>5</sub>Te<sub>3</sub>]<sup>+</sup>, 904 [C<sub>24</sub>H<sub>19</sub>O<sub>4</sub>Te<sub>4</sub>Na]<sup>+</sup>. Anal. calcd for C<sub>12</sub>H<sub>10</sub>O<sub>3</sub>Te<sub>2</sub>: C, 31.51; H, 2.20. Found: C, 31.29; H, 2.04.

**X-ray Crystallography:** X-ray diffraction data were obtained on an Oxford Gemini system using Mo-K $\alpha$  radiation ( $\lambda$  = 0.71073 Å). The structure solutions were achieved by

using direct methods as implemented in SHELXS-97.<sup>2</sup> The structures were refined by full least-squares methods using SHELXL-97.<sup>3</sup>

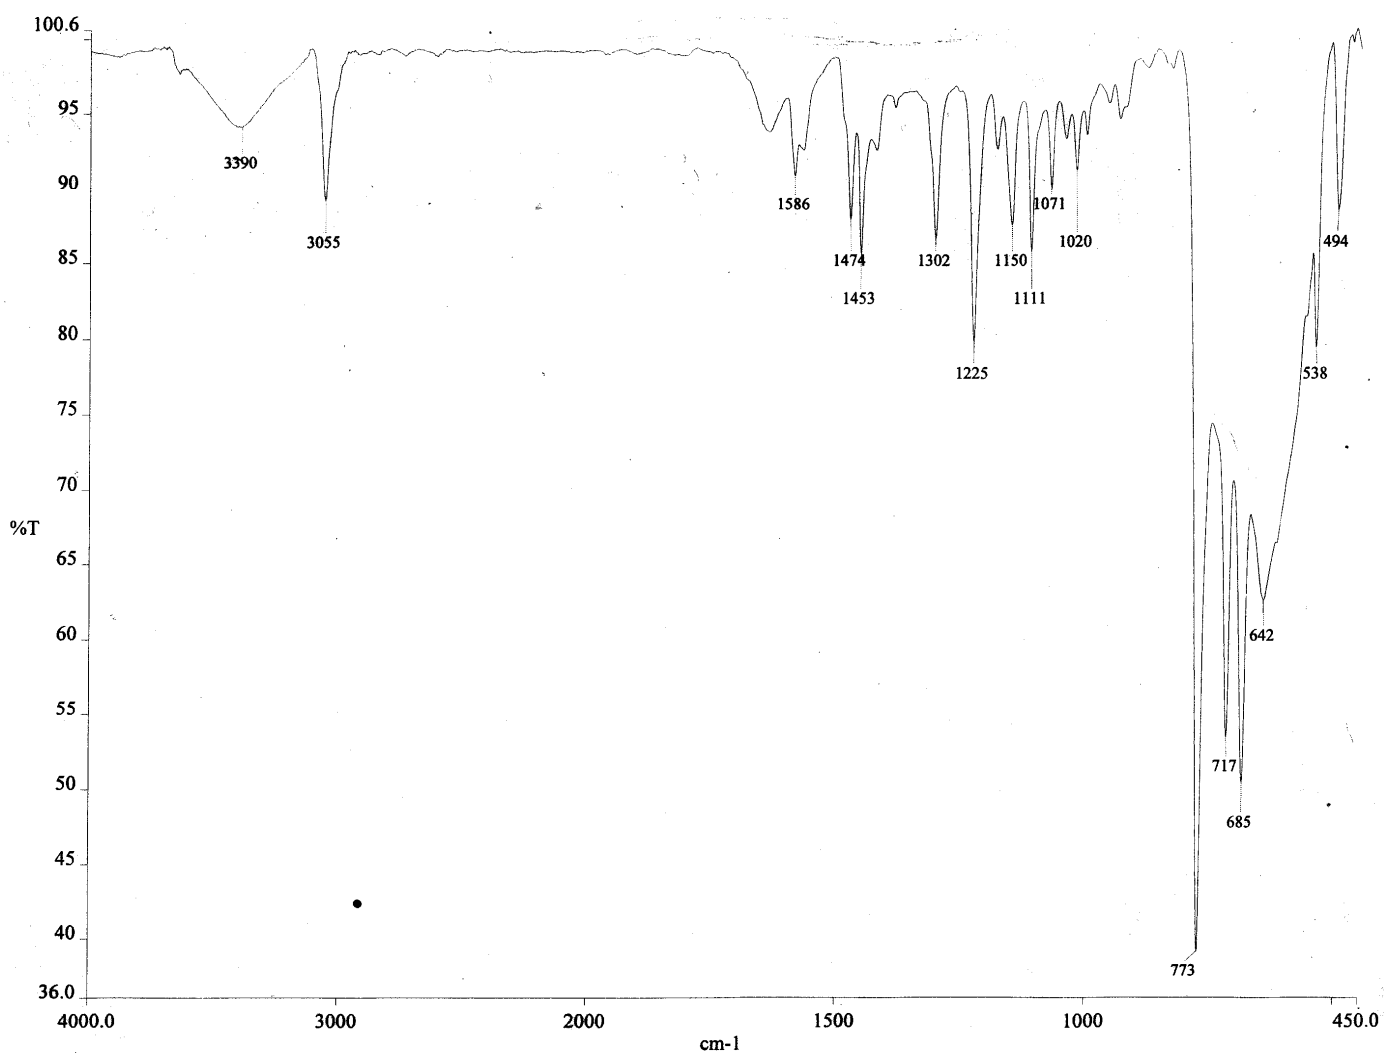

**Figure S1.** FT-IR spectrum of **4**.

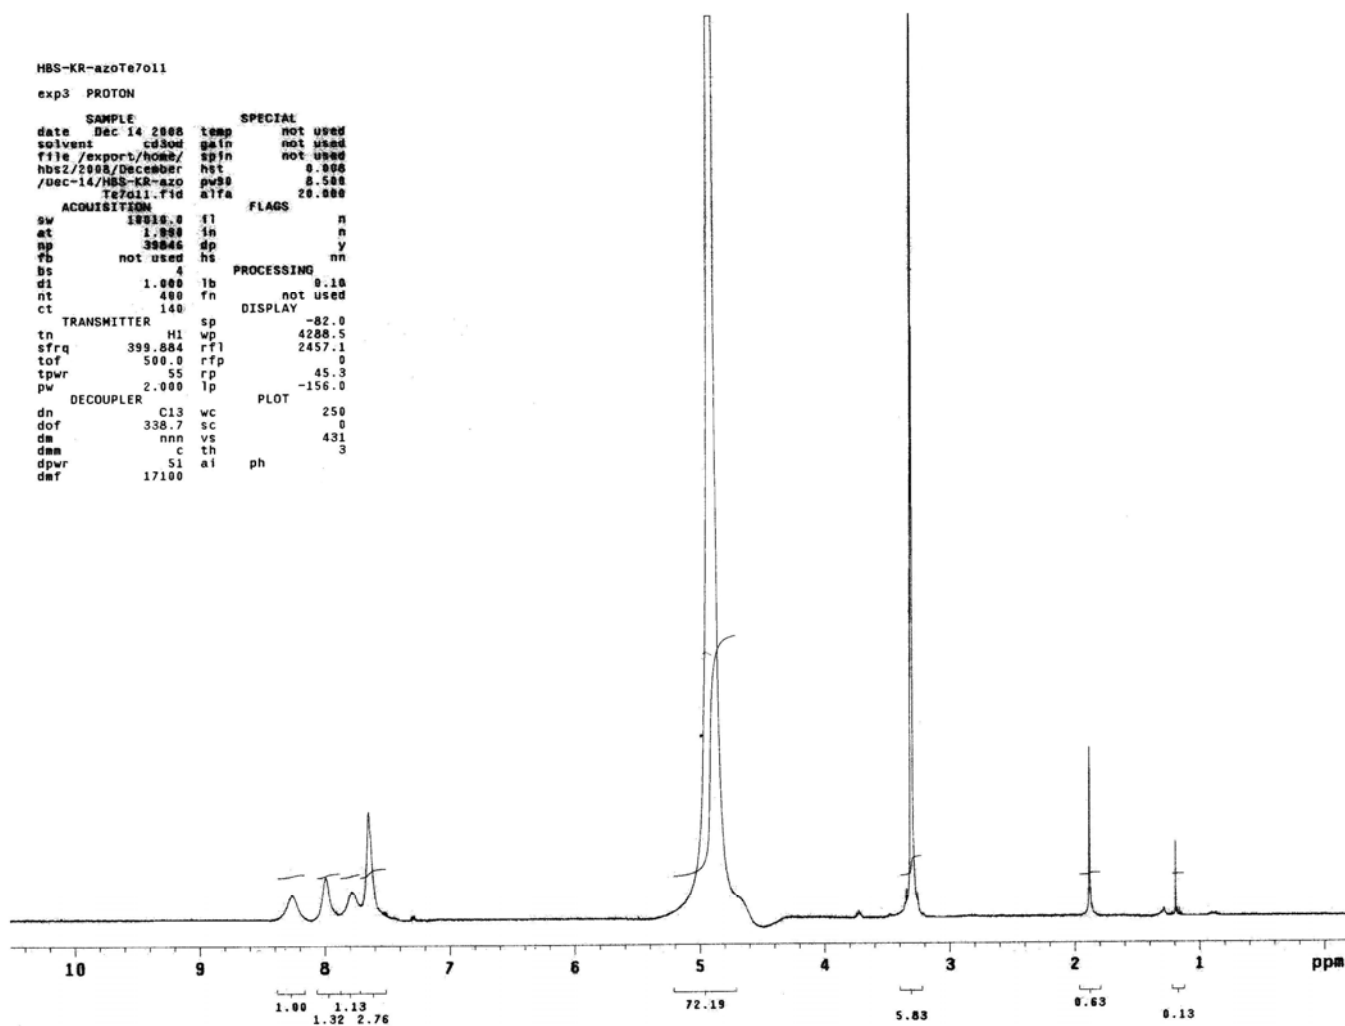

Figure S2.  $^1\text{H}$  NMR spectrum of **4** at 25 °C.

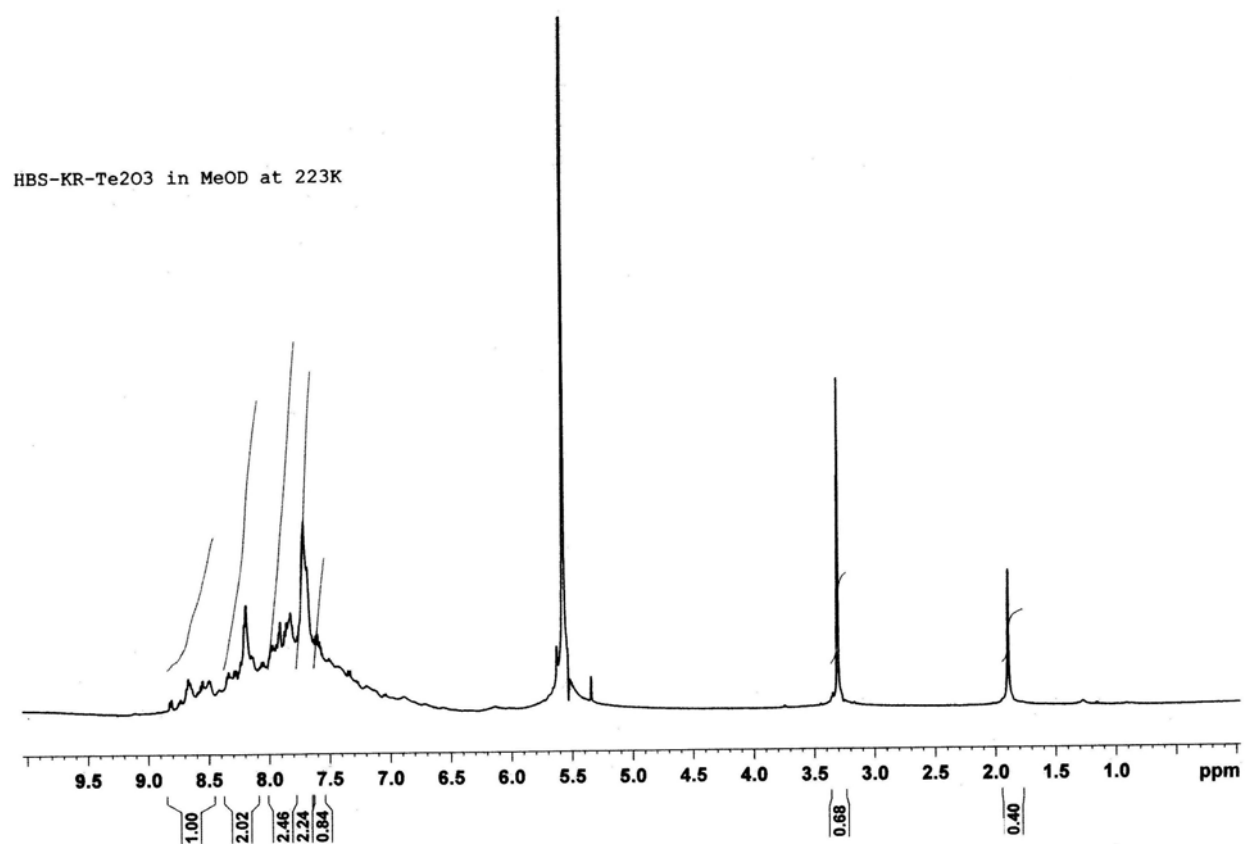

**Figure S3.**  $^1\text{H}$  NMR spectrum of **4** at  $-50\text{ }^\circ\text{C}$ .

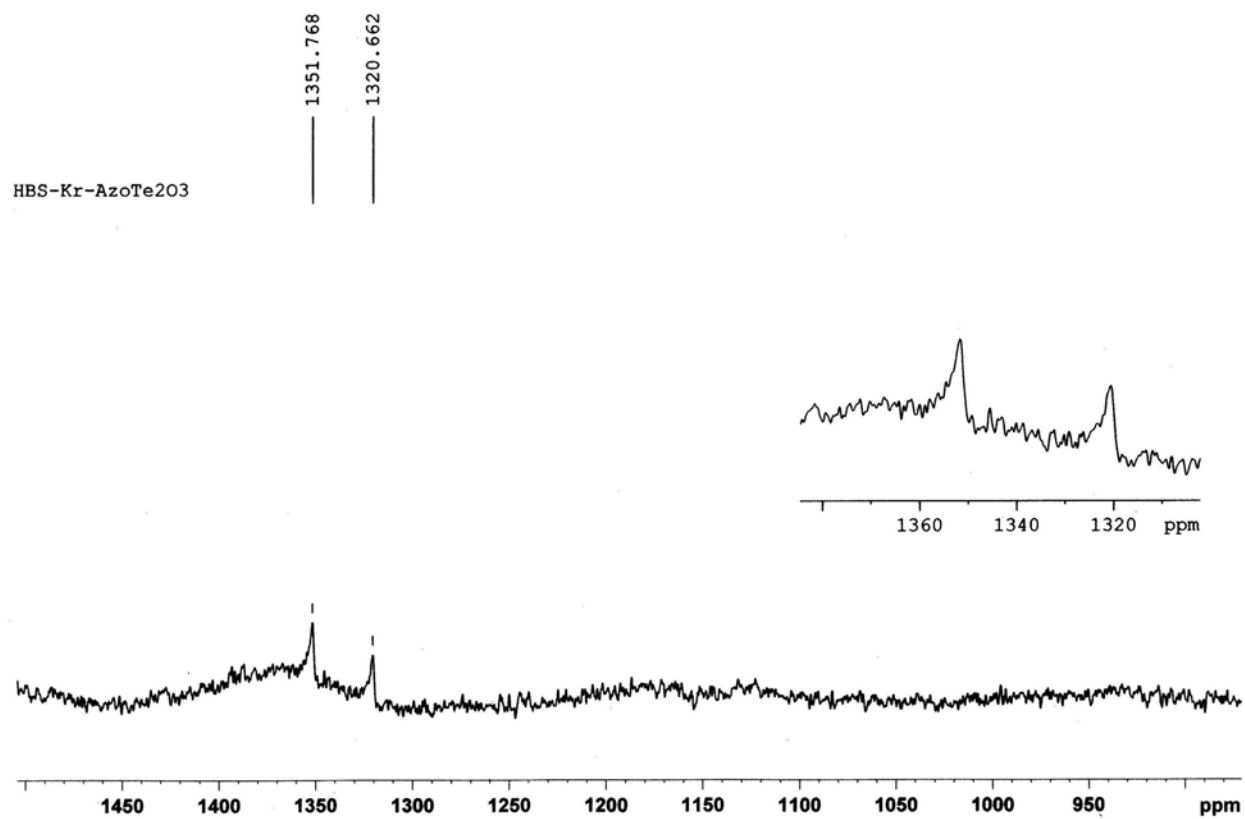

**Figure S4.**  $^{125}\text{Te}$  NMR spectrum of **4** (data acquisition for 29 h)

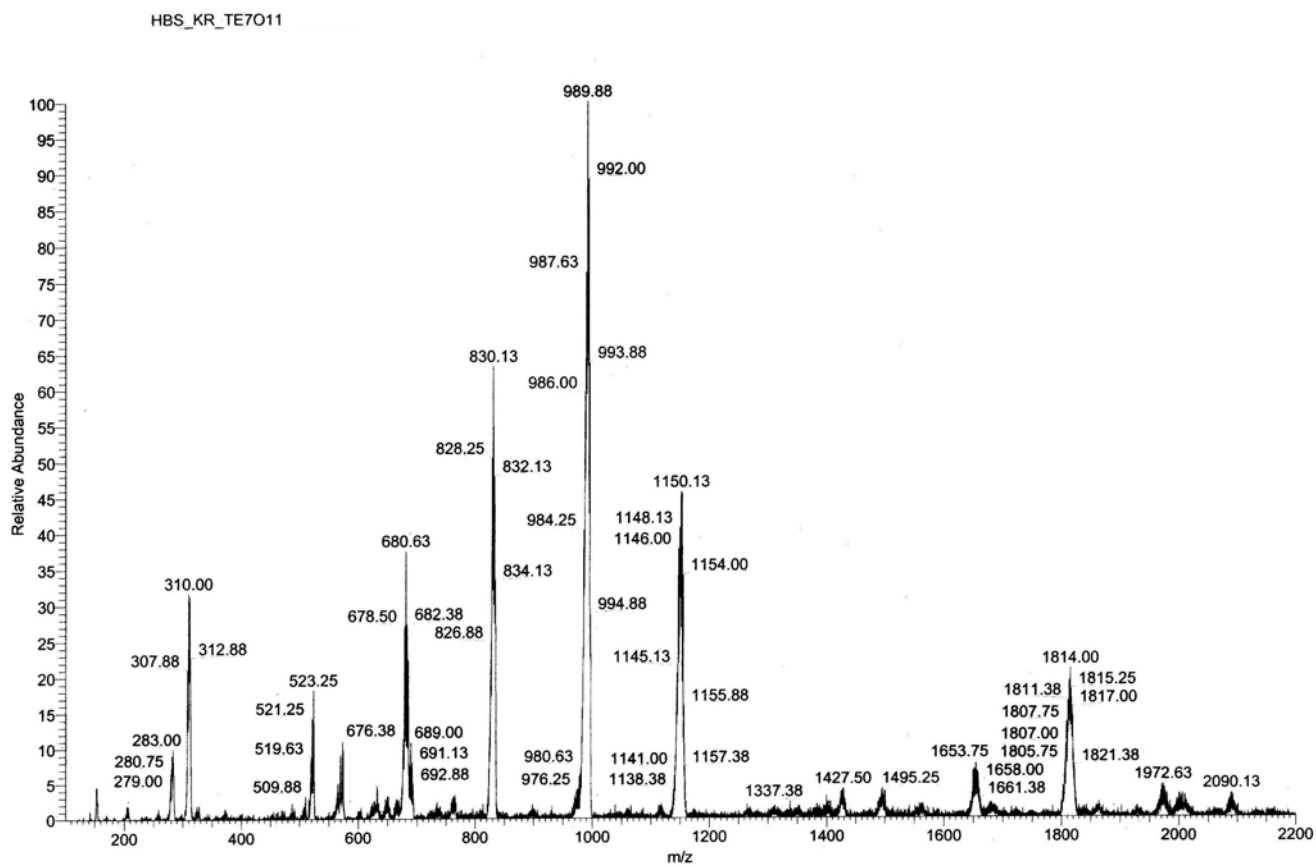

**Figure S5.** ESI-MS of **4**

# Eager 300 Report

Page: 1    Sample: HBS-KR-TE203 (HBS-KR-TE203)

Method Name : sp191208  
Method File : D:\CHNS2008\sp191208.mth  
Chromatogram : HBS-KR-TE203  
Operator ID : SP  
Analysed : 12/19/2008 15:01  
Sample ID : HBS-KR-TE203 (# 29)  
Analysis Type : UnkNown (Area)

Company Name : C.E. Instruments  
Printed : 12/19/2008 16:52  
Instrument N. : Instrument #1  
Sample weight : 1.421

Calib. method : using 'K Factors'

!!! Warning missing one or more peaks.

| Element Name | %       | Ret.Time | Area    | BC | Area ratio | K factor    |
|--------------|---------|----------|---------|----|------------|-------------|
| Nitrogen     | 7.5178  | 43       | 115355  | RS | 13.052280  | .107983E+07 |
| Carbon       | 39.7447 | 66       | 1505646 | RS | 1.000000   | .266121E+07 |
| Hydrogen     | 2.4085  | 172      | 237411  | RS | 6.341938   | .660009E+07 |
| Totals       | 49.6710 |          | 1858412 |    |            |             |

Figure S6. Elemental analysis (C, H, N) of 4

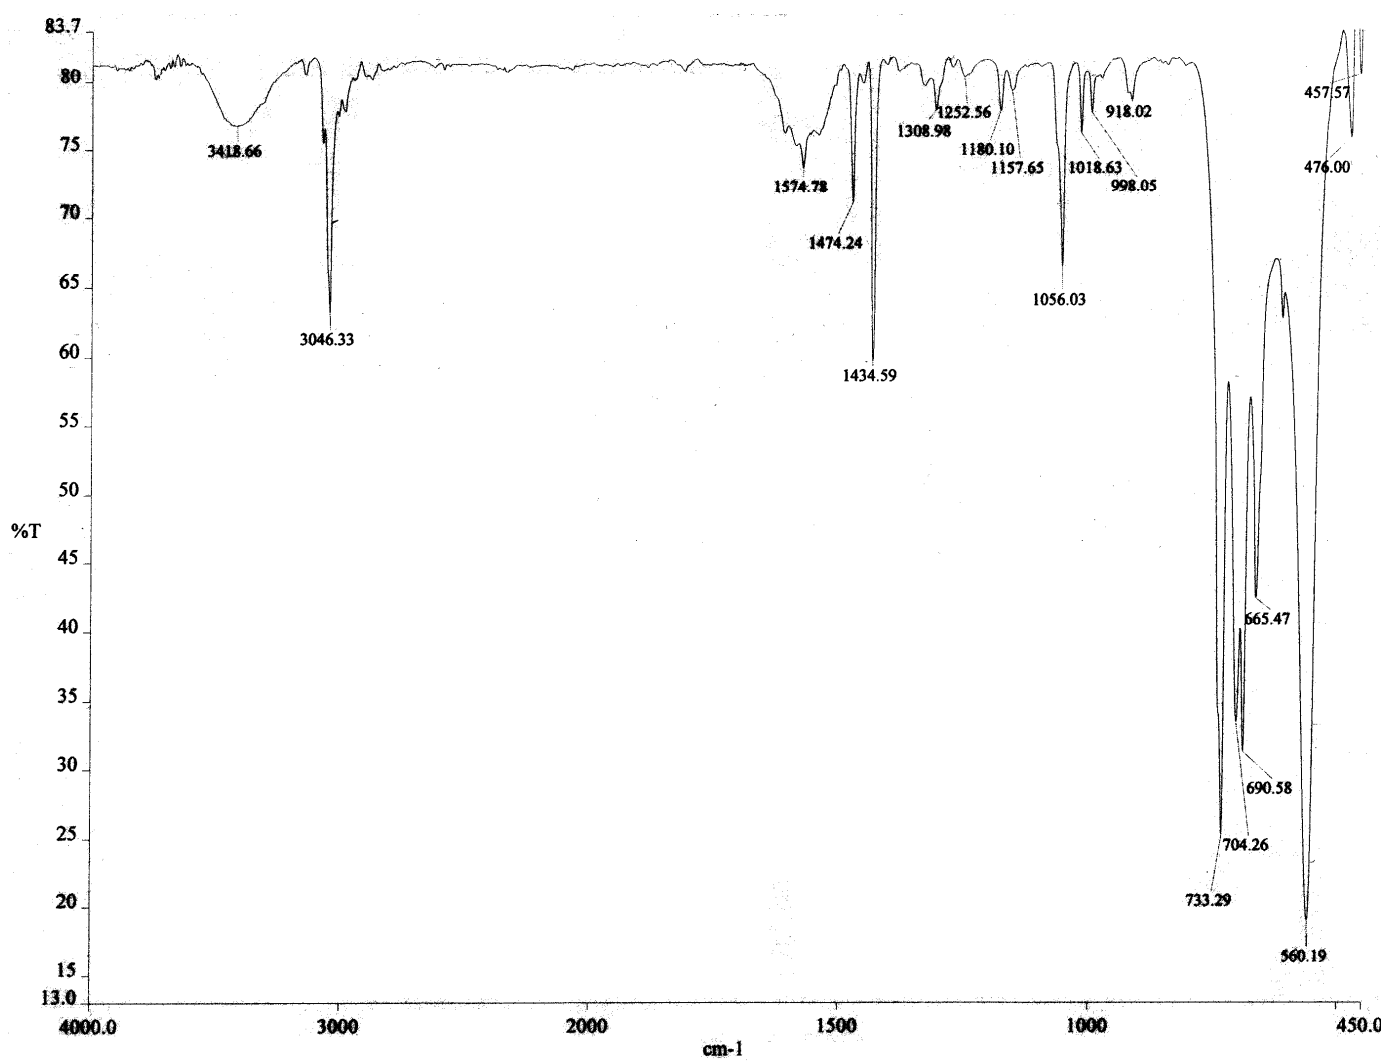

Figure S7. FT-IR spectrum of  $\text{Ph}_2\text{Te}_2\text{O}_3$

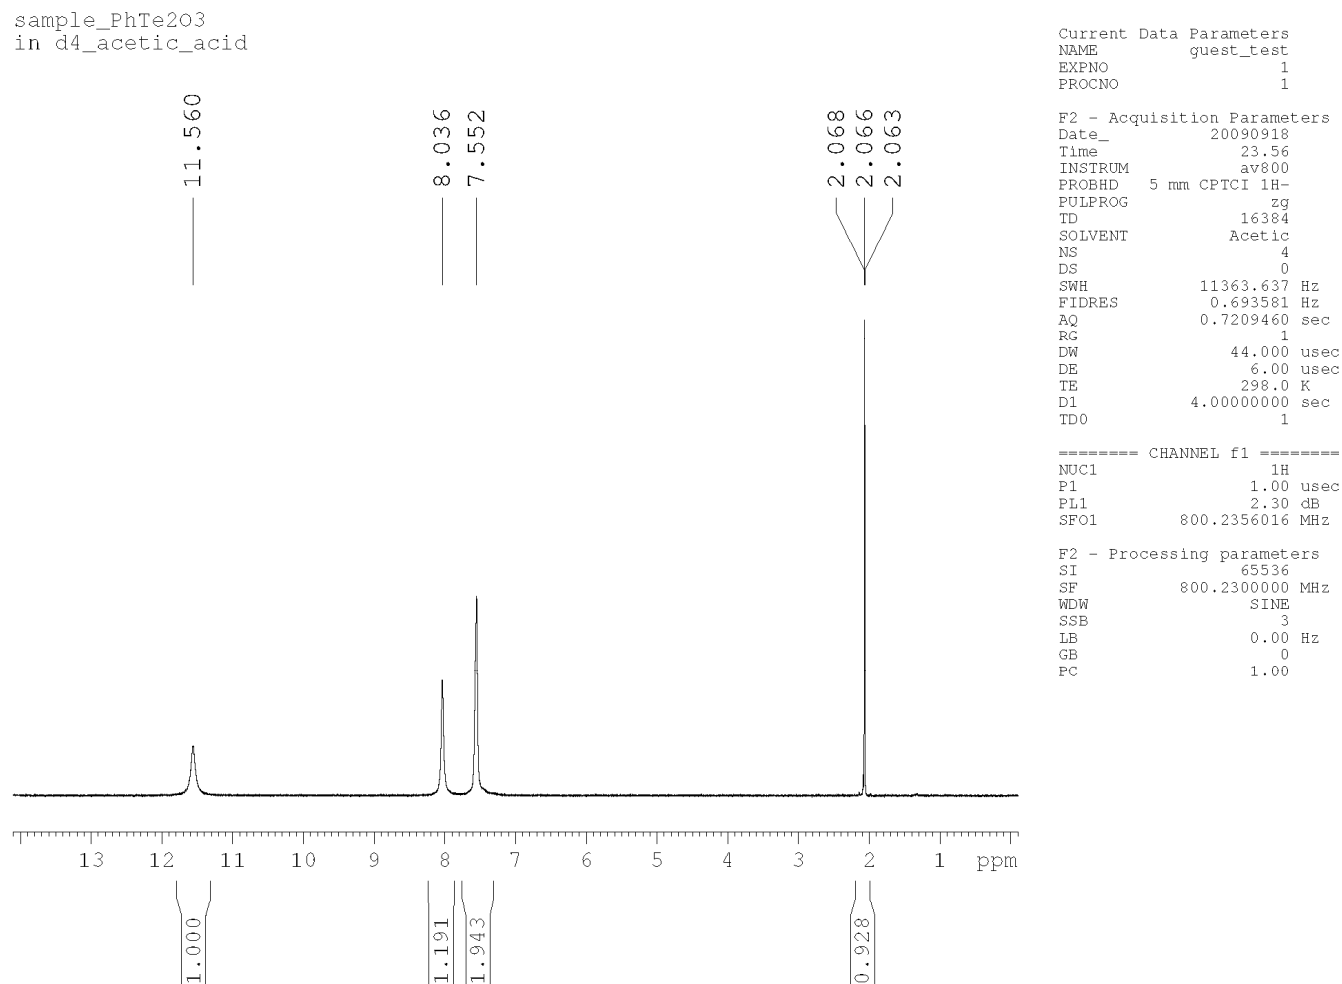

**Figure S8.**  $^1\text{H}$  NMR spectrum of  $\text{Ph}_2\text{Te}_2\text{O}_3$  (In  $\text{CD}_3\text{COOD}$ )

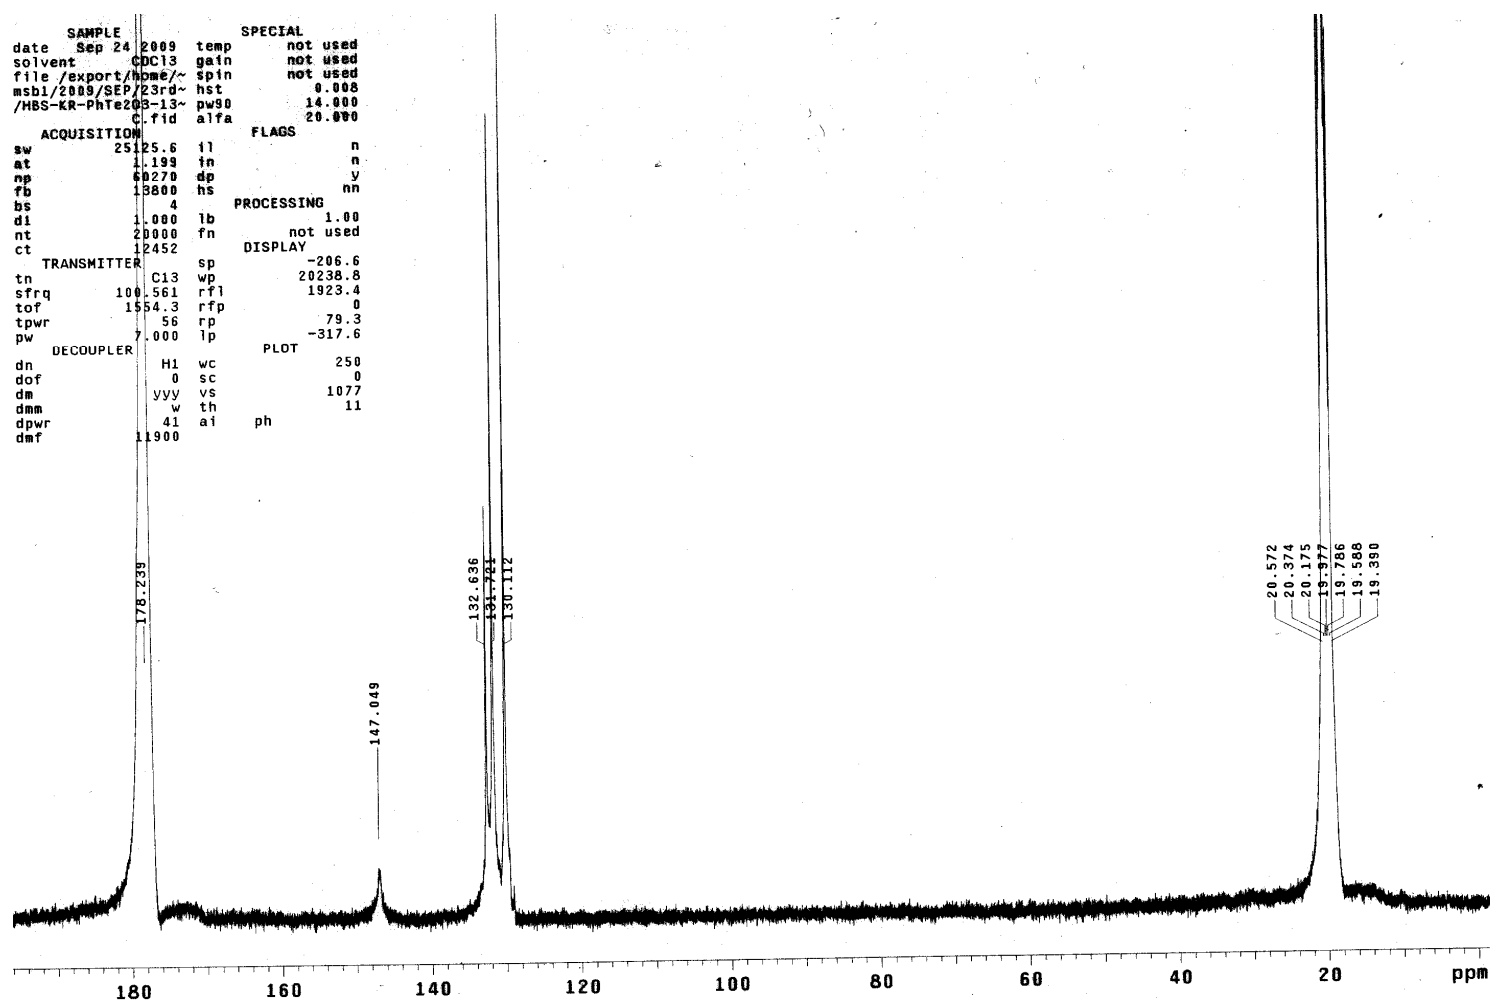

Figure S9.  $^{13}\text{C}$  NMR spectrum of  $\text{Ph}_2\text{Te}_2\text{O}_3$  (In  $\text{CD}_3\text{COOD}$ )

HBS KR  
PHTe203 in acetic acid/DMSO

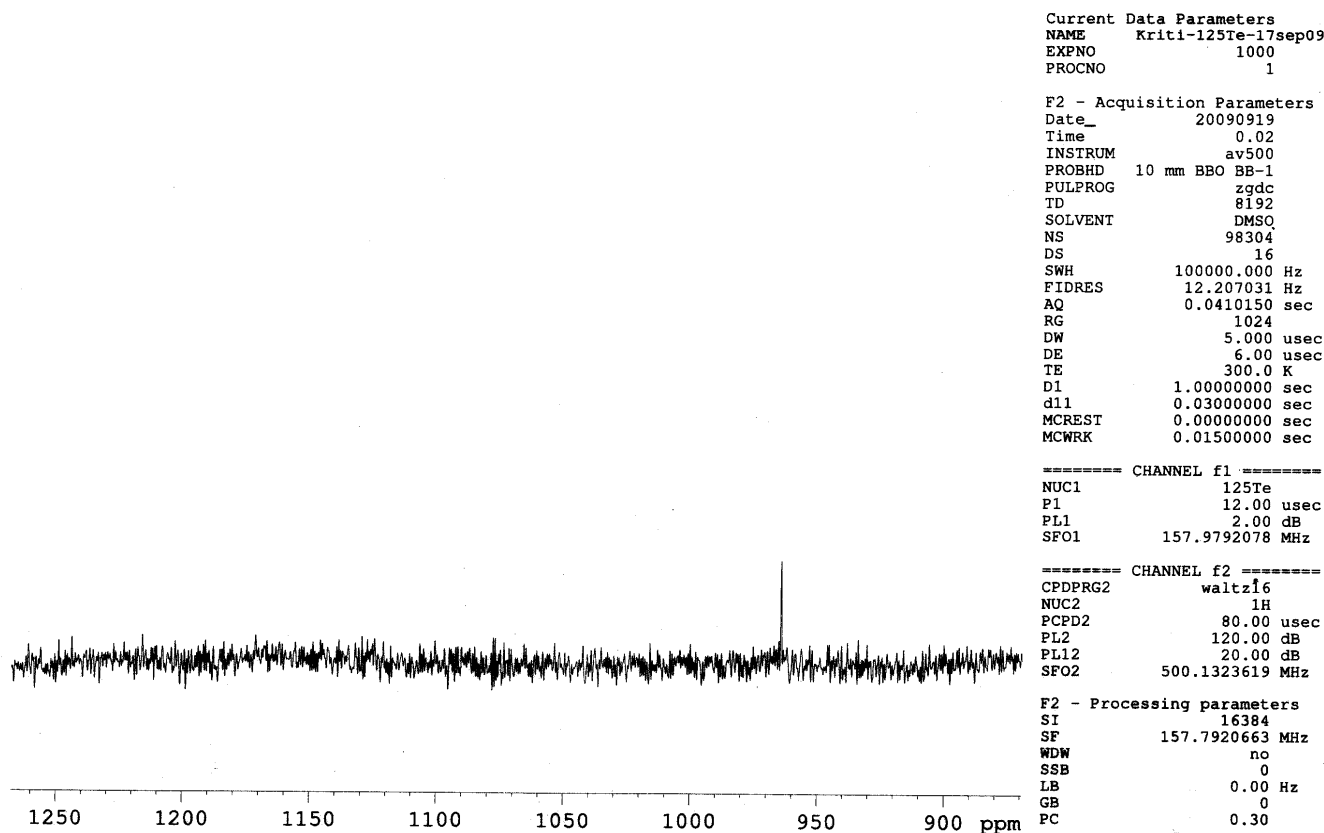

**Figure S10.**  $^{125}\text{Te}$  NMR spectrum of  $\text{Ph}_2\text{Te}_2\text{O}_3$  (Due to expensive  $\text{CD}_3\text{COOD}$ ,  $^{125}\text{Te}$  NMR was recorded in mixture of  $\text{CD}_3\text{COOD}$  and DMSO in 1: 3 ratio)<sup>€</sup>

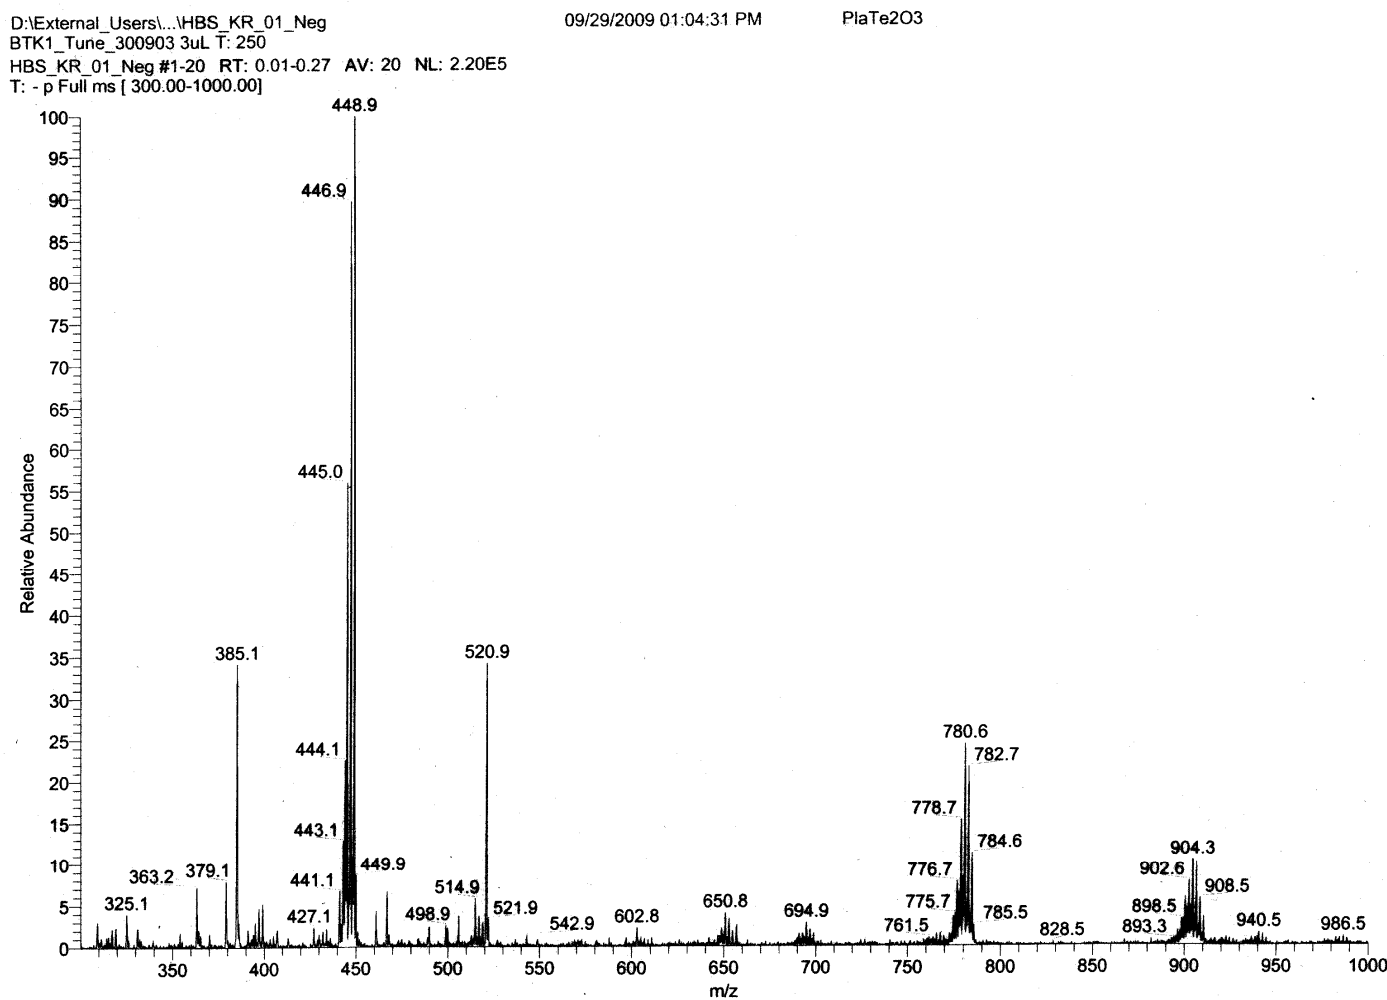

Figure S11. ESI-MS spectrum of  $\text{Ph}_2\text{Te}_2\text{O}_3$

### Eager 300 Report

Page: 1 Sample: KRTEPH (KRTEPH)

Method Name : SP080909  
Method File : D:\CHNS2008\SP080909.mth  
Chromatogram : KRTEPH  
Operator ID : AGK Company Name : C.E. Instruments  
Analysed : 09/08/2009 13:50 Printed : 9/8/2009 14:57  
Sample ID : KRTEPH (# 22) Instrument N. : Instrument #1  
Analysis Type : UnkNown (Area) Sample weight : 1.293

Calib. method : using 'K Factors'

!!! Warning missing one or more peaks.

| Element Name | %       | Ret.Time | Area    | BC | Area ratio | K factor    |
|--------------|---------|----------|---------|----|------------|-------------|
| Carbon       | 31.2856 | 67       | 997006  | RS | 1.000000   | .246465E+07 |
| Hydrogen     | 2.0366  | 175      | 155178  | RS | 6.424915   | .548662E+07 |
| Totals       | 33.3222 |          | 1152184 |    |            |             |

Figure S12. Elemental analysis of  $\text{Ph}_2\text{Te}_2\text{O}_3$

| Entry                        | Anionic multi-tellur-oxane <sup>a</sup> | Oligotellu-<br>-roxane <sup>b</sup> | Polymeric Ditellur-oxane <sup>c</sup> | Macrocyclic Multi-Telluranes <sup>d</sup> | Tellurinic Acid <sup>e</sup> | 4                              |
|------------------------------|-----------------------------------------|-------------------------------------|---------------------------------------|-------------------------------------------|------------------------------|--------------------------------|
| Te-O<br>(short bonds)        | 1.908-1.941<br>(sixteen bonds)          | 1.890(8)<br>1.896(8)<br>1.916(8)    |                                       |                                           | 1.897(5)                     | 1.863-1.891<br><br>1.911-1.913 |
| Te-O<br>(intermediate bonds) |                                         | 1.964(7)                            | 2.025(2)                              | 1.99(2)-2.03(2)                           |                              | 1.987-2.023                    |
| Te-O<br>(long bonds)         | 2.091-2.157<br>(sixteen bonds)          | 2.089(8)<br>2.116(8)                | 2.100(2)                              | 2.23(2)-2.29(2)                           | 2.143(5)<br>and<br>2.232(4)  | 2.063-2.106<br><br>2.174-2.249 |

**Table S1: Comparision of Te-O Bond Lengths of 4 with related Telluroxanes**

<sup>a</sup> H. Citeau, K. Kirschbaum, O. Conrad and D. M. Giolando, *Chem. Commun.*, 2001, 2006-2007.

- <sup>b</sup> K. Kobayashi, N. Deguchi, O. Takahashi, K. Tanaka, E. Horn, O. Kikuchi and N. Furukawa, *Angew. Chem., Int. Ed.*, 1999, **38**, 1638-1640.
- <sup>c</sup> J. Beckmann, D. Dakternieks, A. Duthie, F. Ribot, M. Schürmann and N. A. Lewcenko, *Organometallics*, 2003, **22**, 3257-3261.
- <sup>d</sup> K. Kobayashi, H. Izawa, K. Yamaguchi, E. Horn and N. Furukawa, *Chem. Commun.*, 2001, 1428-1429.
- <sup>e</sup> J. Beckmann, P. Finke, M. Hesse and B. Wellig, *Angew. Chem., Int. Ed.*, 2008, **47**, 9982-9984.

**References:**

1. (a) Z. Majeed, W. R. McWhinnie and T. A. Hamor, *J. Organomet. Chem.*, 1997, **549**, 257-262; (b) R. E. Cobbleddick, F. W. B. Einstein, W. R. McWhinnie and F. H. Musa, *J. Chem. Res. (M)*., 1979, 1901-1909.
2. G. M. Sheldrick, SHELXS-97, Program for the Solution of Crystal Structures, University of Göttingen, Göttingen (Germany), 1997.
3. G. M. Sheldrick, SHELXL-97, Program for the Refinement of Crystal Structures, University of Göttingen, Göttingen (Germany), 1997.
